# Supplementary material for: Expansion of Single Chains Released from a Spherical Cavity
Source: MDPI journal article supplement (doi:10.3390/polym15010198), 2022-12-30
Supplement: s1 [file s1]

# Supplementary Information

## Expansion of Single Chains Released from a Spherical Cavity

Chia-Cheng Chu<sup>1</sup> and Pai-Yi Hsiao<sup>2,1\*</sup>

<sup>1</sup>Institute of Nuclear Engineering and Science, National Tsing Hua University, Hsinchu, Taiwan, R.O.C.

<sup>2</sup>Department of Engineering and System Science,  
National Tsing Hua University, Hsinchu, Taiwan, R.O.C.

\*Corresponding author, email: pyhsiao@ess.nthu.edu.tw; pyhsiao@mx.nthu.edu.tw

### S1. DETERMINATION OF THE $\theta$ VALUE FOR COLLAPSING THE $\tilde{R}$ CURVES

In Section 4.2 (Scaling Behavior of Chain Size in the Second Stage), the collapse of the curves of the normalized chain size  $\tilde{R}$  in Figure 6 was studied by using different scaling factor  $\theta$  for time. We observed that the group of the curves exhibits a neck region located in the region  $[2 \times 10^5, 4 \times 10^5]$  for the scaled time  $t_\theta = t \times \theta^{9-g_N}$ . An enlarged plot of Figure 6 is given in Figure S1.

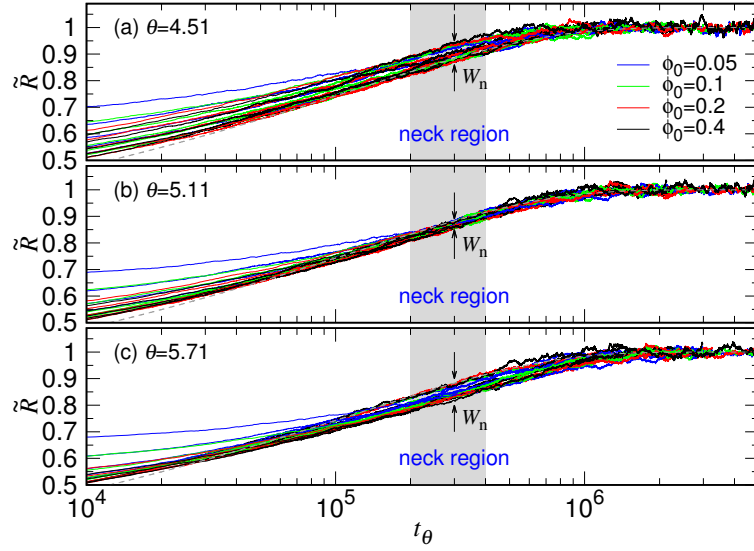

Figure. S1. Replot of Figure  $\tilde{R}$  vs.  $t_\theta$ , in order to see clearly the “neck” of the group of the collapsed curves at the three  $\theta$  values.

We define the neck width  $W_n(t_\theta)$  to be the difference between the largest and the smallest  $\tilde{R}$  in the group curves at a given time point  $t_\theta$ . Figure S2 presents the results of calculation for the mean width  $\langle W_n \rangle$  in the neck region by scanning the  $\theta$  value from 4.4 to 6.0 in an increment of 0.01. We can see that the narrowest neck is produced by using  $\theta = 5.11$ , which represents the best collapse of the curves at a precision of  $\theta$  to the second decimal.

### S2. STUDY OF THE DYNAMIC EXPONENT $\beta$ FOR THE SECOND STAGE

Here we present a double-check for the value of the dynamic exponent  $\beta$  in the equation

$$\tilde{R}(t) = \left( 1 - \exp \left( -\frac{t}{\tau_c} \right) \right)^\beta. \quad (\text{S1})$$

The quantity  $G(t, \tau_c) = \ln \left( 1 - \exp \left( -\frac{t}{\tau_c} \right) \right) / \ln \tilde{R}(t)$  is calculated from the simulation data and plotted against  $t$  in Figure S3 for  $N = 512$ . The parameter  $\tau_c$  is taken from the level-off value,  $4.03 \times 10^5$ , obtained in Figure 7. We can see that  $G(t, \tau_c)$  decreases rapidly and attends a value of about 5 when  $t > 10^5$ . It agrees well with the prediction  $\beta^{-1} = 5$  of our scaling theory. The large fluctuations appeared in the region  $t > 5 \times 10^5$  come from the statistical error because the denominator of  $G(t, \tau_c)$  tends to zero as  $t$  goes to infinity and consequently, the uncertainty is amplified.

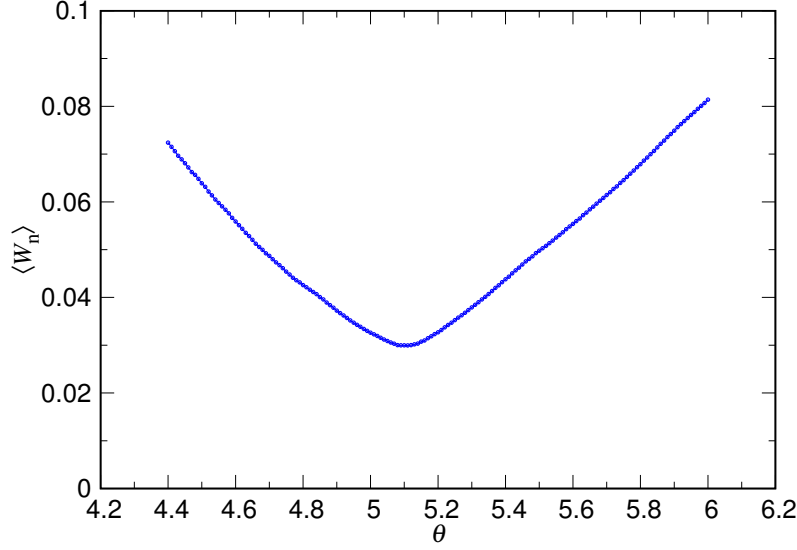

Figure. S2. Mean neck width  $\langle W_n \rangle$  of the group curves in the time region  $t_\theta \in [2 \times 10^5, 4 \times 10^5]$ , as a function of the scaling factor  $\theta$ .

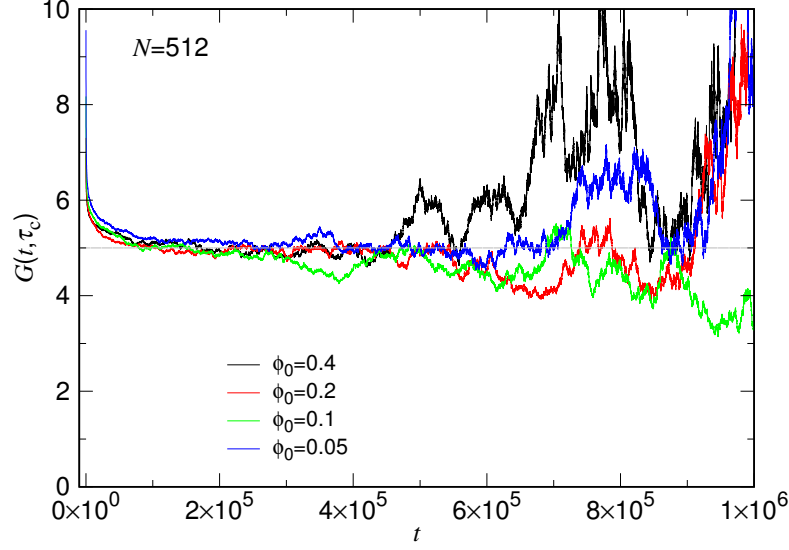

Figure. S3. Quantity  $G(t, \tau_c) = \left(1 - \exp\left(-\frac{t}{\tau_c}\right)\right) / \ln \tilde{R}(t)$  calculated for  $N = 512$  by setting  $\tau_c = 4.03 \times 10^5$ . The value of  $\phi_0$  can be read in the legend.

### S3. DETERMINATION OF THE $\omega$ VALUE FOR BEST COLLAPSE OF THE $R'$ CURVES

In Section 4.4 (Scaling Behavior in the First Stage), the variations of the scaled chain size  $R' = R/R_0$  in Figure 12 are collapsed by using an appropriate  $\omega$  value to scale time through the formula  $t_\omega = t \times 2^{9-gN}$ . The way how we determined the  $\omega$  value is explained below. We calculated the mean distribution width  $\langle W_1 \rangle$  for the group of the  $R'$  curves in the beginning  $t_\omega$  region by scanning the  $\omega$  value from 1.4 to 2.0 in an increment of 0.01. The results, presented in Figure S4, were then used to determine the minimum of  $\langle W_1 \rangle$ , occurred at  $\omega = 1.55, 1.64, 1.73$ , and 1.81 for the cases  $\phi_0 = 0.4, 0.2, 0.1$ , and 0.05, respectively. These  $\omega$  values give the best collapse of the curves, as having been shown in Panels (a2), (b2), (c2) and (d2) of Figure 12.

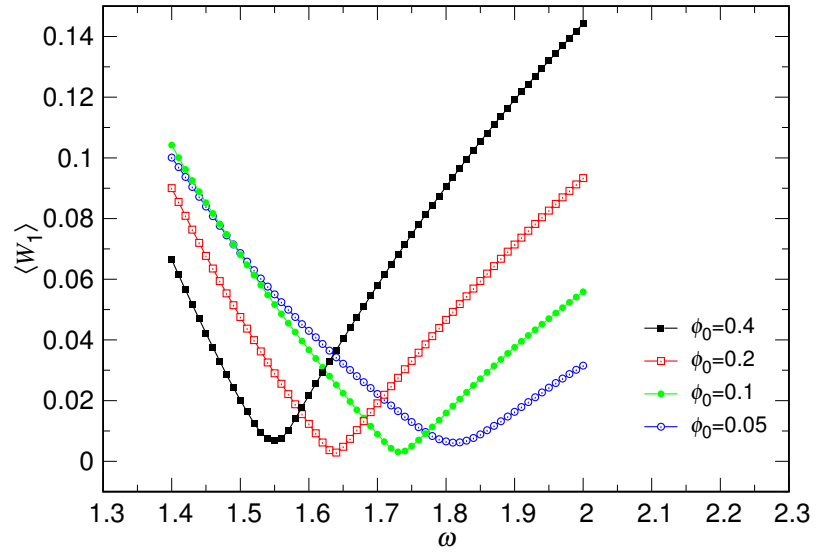

Figure. S4. Mean distribution width  $\langle W_1 \rangle$  of the collapsed  $R'$  curves in the beginning  $t_\omega$  region, calculated as a function of  $\omega$ . The  $\phi_0$  values are indicated in the legend.
